# Supplementary material for: Discovery and Genome Characterization of a Closterovirus from Wheat Plants with Yellowing Leaf Symptoms in Japan
Source: MDPI journal article supplement (doi:10.3390/pathogens12030358), 2023-02-21
Supplement: s1 [file s1]

## **Supplementary Materials:**

### **Discovery and genome characterization of a closterovirus from wheat plants with yellowing leaf symptoms in Japan**

Hideki Kondo<sup>1,\*</sup>, Hitomi Sugahara<sup>1</sup>, Miki Fujita<sup>1</sup>, Kiwamu Hyodo<sup>1</sup>, Ida Bagus Andika<sup>2</sup>, Hiroshi Hisano<sup>1</sup>, and Nobuhiro Suzuki<sup>1</sup>

<sup>1</sup> Institute of Plant Science and Resources (IPSR), Okayama University, Kurashiki 710-0046, Japan

<sup>2</sup> College of Plant Health and Medicine, Qingdao Agricultural University, Qingdao 266109, China.

\* Correspondence: **author Hideki Kondo** Institute of Plant Science and Resources (IPSR), Okayama University, Kurashiki 710-0046, Japan E-mail: [hkondo@okayama-u.ac.jp](mailto:hkondo@okayama-u.ac.jp) Tel. +81(86) 434-1232 / Fax. +81(86) 434-1232

**Supplemental Tables, 1; Supplemental Figures, 4**

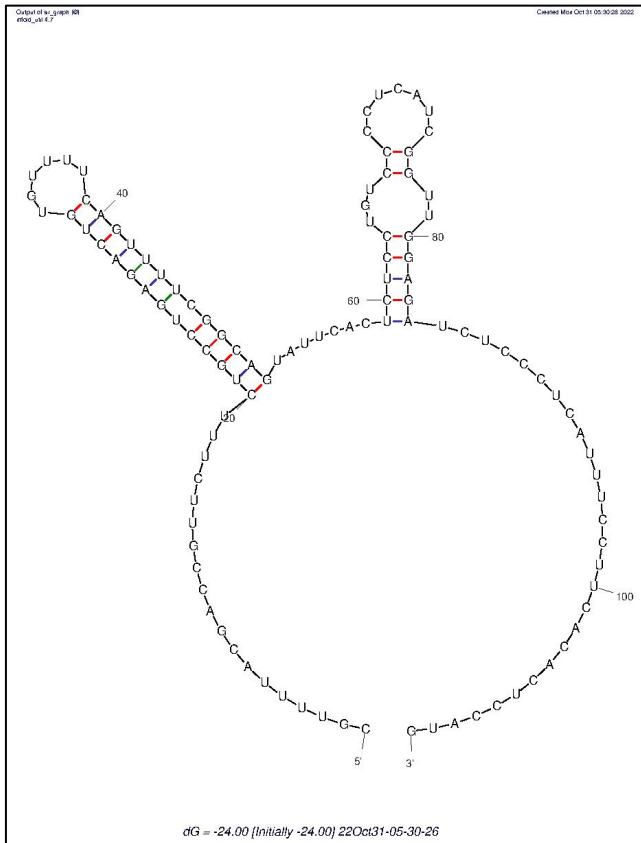

**5' UTR ( $\Delta G = -24.00$  kcal/mol)**

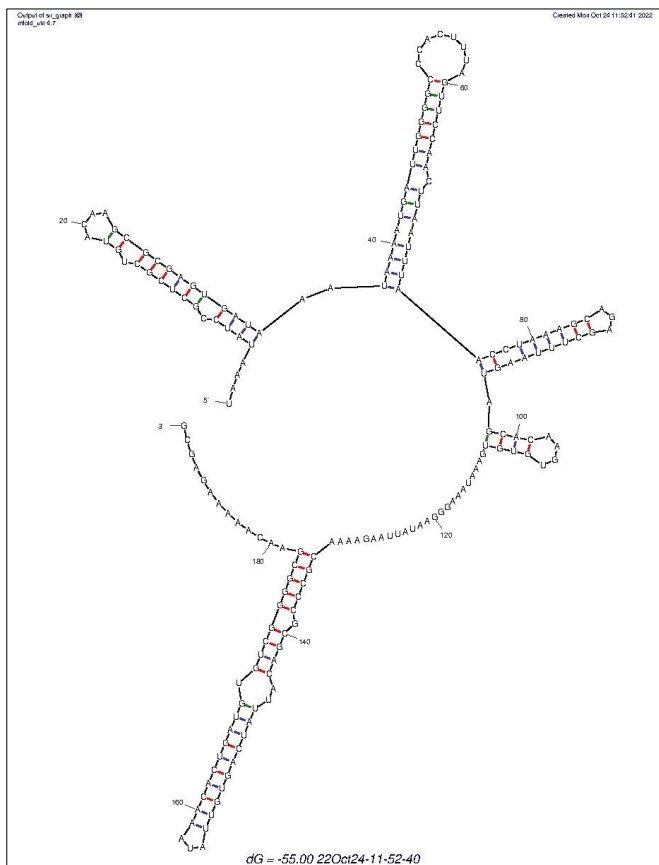

**3' UTR ( $\Delta G = -55.00$  kcal/mol)**

**Figure S1.** The potential secondary structures of the 5'- and 3'-UTRs of the WhCV1-WL19a genome RNA as predicted by Mfold under default settings.

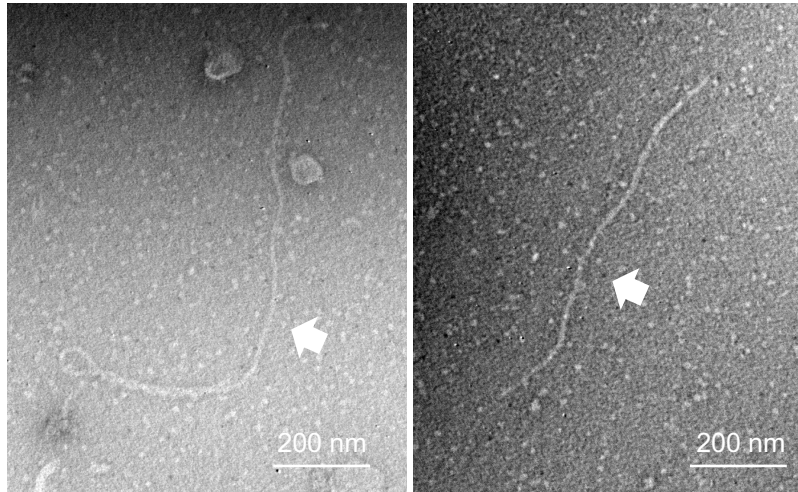

**Figure S2.** The representative virus-like particles observed in the wheat seedling infected with WhCV1-WL20 showing mild yellowing leaf symptoms after aphid feeding inoculation (see Figure 3A and B). The scale bar is 200 nm.

A

Percent Identity Matrix - created by Clustal Omega

| virus name                                    | HSP70h accession no. | 1   | 2   | 3   | 4   | 5   | 6   | 7   | 8   | 9   | 10  | 11  | 12  | 13  | 13  | 14  | 16  | 17  | 18  |
|-----------------------------------------------|----------------------|-----|-----|-----|-----|-----|-----|-----|-----|-----|-----|-----|-----|-----|-----|-----|-----|-----|-----|
| 1 blackcurrant closterovirus 1                | YP_009553662         | 100 |     |     |     |     |     |     |     |     |     |     |     |     |     |     |     |     |     |
| 2 citrus tristeza virus                       | NP_042864            | 39  | 100 |     |     |     |     |     |     |     |     |     |     |     |     |     |     |     |     |
| 3 raspberry leaf mottle virus                 | YP_874188            | 39  | 45  | 100 |     |     |     |     |     |     |     |     |     |     |     |     |     |     |     |
| 4 rose leaf rosette-associated virus          | YP_009058932         | 41  | 48  | 52  | 100 |     |     |     |     |     |     |     |     |     |     |     |     |     |     |
| 5 strawberry chlorotic fleck-associated virus | YP_762625            | 38  | 47  | 53  | 52  | 100 |     |     |     |     |     |     |     |     |     |     |     |     |     |
| 6 arracacha virus 1                           | YP_009551996         | 38  | 39  | 40  | 39  | 38  | 100 |     |     |     |     |     |     |     |     |     |     |     |     |
| 7 WhCV1_WL19a (CSL19_contig 5)                |                      | 39  | 42  | 41  | 39  | 40  | 42  | 100 |     |     |     |     |     |     |     |     |     |     |     |
| 8 WhCV1-WL20 (CSL20_contig 8_12)              |                      | 39  | 42  | 41  | 39  | 40  | 42  | 98  | 100 |     |     |     |     |     |     |     |     |     |     |
| 9 TSA_Triticum polonicum closterovirus        | DAZ91134             | 39  | 42  | 41  | 39  | 40  | 42  | 98  | 100 | 100 |     |     |     |     |     |     |     |     |     |
| 10 mint virus 1                               | YP_224093            | 37  | 38  | 41  | 42  | 39  | 39  | 46  | 46  | 46  | 100 |     |     |     |     |     |     |     |     |
| 11 rehmannia virus 1                          | YP_009552006         | 38  | 40  | 43  | 41  | 39  | 39  | 44  | 44  | 44  | 62  | 100 |     |     |     |     |     |     |     |
| 12 tobacco virus 1                            | YP_009162624         | 37  | 39  | 43  | 41  | 38  | 38  | 43  | 44  | 44  | 66  | 74  | 100 |     |     |     |     |     |     |
| 13 carnation necrotic fleck virus             | YP_009506334         | 44  | 45  | 49  | 48  | 45  | 43  | 52  | 52  | 52  | 57  | 57  | 56  | 100 |     |     |     |     |     |
| 14 carrot yellow leaf virus                   | YP_003075968         | 42  | 45  | 45  | 43  | 44  | 43  | 50  | 51  | 51  | 49  | 50  | 50  | 63  | 100 |     |     |     |     |
| 15 carrot closterovirus 1                     | AHA85412             | 42  | 45  | 45  | 44  | 44  | 42  | 51  | 52  | 52  | 51  | 50  | 48  | 61  | 69  | 100 |     |     |     |
| 16 grapevine leafroll-associated virus 2      | YP_337914            | 39  | 39  | 39  | 37  | 38  | 40  | 42  | 42  | 42  | 40  | 41  | 40  | 46  | 44  | 44  | 100 |     |     |
| 17 beet yellows virus                         | NP_041872            | 41  | 40  | 45  | 42  | 40  | 44  | 45  | 45  | 45  | 42  | 47  | 45  | 50  | 48  | 47  | 47  | 100 |     |
| 18 beet yellow stunt virus                    | YP_009664807         | 41  | 41  | 40  | 39  | 41  | 43  | 45  | 45  | 45  | 42  | 43  | 42  | 48  | 48  | 48  | 47  | 53  | 100 |

B

Percent Identity Matrix - created by Clustal Omega

| virus name                                     | RdRP accession no. | 1   | 2   | 3   | 4   | 5   | 6   | 7   | 8   | 9   | 10  | 11  | 12  | 13  | 13 | 14  | 16  | 17  | 18  |
|------------------------------------------------|--------------------|-----|-----|-----|-----|-----|-----|-----|-----|-----|-----|-----|-----|-----|----|-----|-----|-----|-----|
| 1 carrot yellow leaf virus                     | YP_003075965       | 100 |     |     |     |     |     |     |     |     |     |     |     |     |    |     |     |     |     |
| 2 carrot closterovirus 1                       | AHA85410           | 84  | 100 |     |     |     |     |     |     |     |     |     |     |     |    |     |     |     |     |
| 3 carnation necrotic fleck virus               | YP_009506332       | 61  | 60  | 100 |     |     |     |     |     |     |     |     |     |     |    |     |     |     |     |
| 4 mint virus 1                                 | YP_224091          | 64  | 63  | 69  | 100 |     |     |     |     |     |     |     |     |     |    |     |     |     |     |
| 5 rehmannia virus 1                            | YP_009552003*      | 65  | 66  | 65  | 82  | 100 |     |     |     |     |     |     |     |     |    |     |     |     |     |
| 6 tobacco virus 1                              | YP_009162622       | 65  | 64  | 67  | 83  | 89  | 100 |     |     |     |     |     |     |     |    |     |     |     |     |
| 7 WhCV1_WL19a (CSL19_contig 5)                 |                    | 56  | 54  | 56  | 59  | 59  | 59  | 100 |     |     |     |     |     |     |    |     |     |     |     |
| 8 WhCV1-WL20 (CSL20_contig 8_12)               |                    | 56  | 55  | 57  | 58  | 60  | 60  | 88  | 100 |     |     |     |     |     |    |     |     |     |     |
| 9 TSA_Triticum polonicum closterovirus         | DAZ91132*          | 55  | 55  | 57  | 58  | 59  | 59  | 89  | 99  | 100 |     |     |     |     |    |     |     |     |     |
| 10 rose leaf rosette-associated virus          | YP_009058929       | 54  | 54  | 54  | 55  | 54  | 55  | 55  | 55  | 55  | 100 |     |     |     |    |     |     |     |     |
| 11 citrus tristeza virus                       | NP_042860          | 55  | 54  | 56  | 58  | 56  | 58  | 58  | 58  | 58  | 57  | 100 |     |     |    |     |     |     |     |
| 12 raspberry leaf mottle virus                 | YP_874185          | 55  | 54  | 53  | 56  | 55  | 55  | 58  | 59  | 58  | 62  | 64  | 100 |     |    |     |     |     |     |
| 13 strawberry chlorotic fleck-associated virus | YP_762622          | 56  | 57  | 56  | 56  | 58  | 57  | 58  | 58  | 58  | 61  | 65  | 65  | 100 |    |     |     |     |     |
| 14 blackcurrant closterovirus 1                | YP_009553660*      | 52  | 50  | 52  | 52  | 52  | 52  | 52  | 52  | 50  | 53  | 54  | 52  | 100 |    |     |     |     |     |
| 15 grapevine leafroll-associated virus 2       | YP_337912          | 55  | 54  | 56  | 56  | 57  | 56  | 55  | 54  | 54  | 52  | 55  | 55  | 55  | 56 | 100 |     |     |     |
| 16 arracacha virus 1                           | YP_009551994       | 55  | 55  | 55  | 58  | 57  | 59  | 55  | 55  | 55  | 51  | 56  | 55  | 56  | 58 | 61  | 100 |     |     |
| 17 beet yellows virus                          | NP_041870*         | 58  | 56  | 57  | 58  | 56  | 57  | 57  | 55  | 56  | 55  | 58  | 57  | 59  | 55 | 60  | 64  | 100 |     |
| 18 beet yellow stunt virus                     | YP_009664804       | 56  | 55  | 53  | 56  | 56  | 57  | 58  | 57  | 57  | 53  | 58  | 57  | 59  | 56 | 62  | 65  | 66  | 100 |

C

Percent Identity Matrix - created by Clustal Omega

| virus name                                    | CP accession no. | 1   | 2   | 3   | 4   | 5     | 6     | 7   | 8   | 9   | 10  | 11  | 12  | 13  | 13  | 14  | 16  | 17  |
|-----------------------------------------------|------------------|-----|-----|-----|-----|-------|-------|-----|-----|-----|-----|-----|-----|-----|-----|-----|-----|-----|
| 1 citrus tristeza virus                       | NP_042867        | 100 |     |     |     |       |       |     |     |     |     |     |     |     |     |     |     |     |
| 2 strawberry chlorotic fleck-associated virus | YP_762628        | 29  | 100 |     |     |       |       |     |     |     |     |     |     |     |     |     |     |     |
| 3 rose leaf rosette-associated virus          | YP_009058935     | 25  | 31  | 100 |     |       |       |     |     |     |     |     |     |     |     |     |     |     |
| 4 raspberry leaf mottle virus                 | YP_874191        | 34  | 31  | 40  | 100 |       |       |     |     |     |     |     |     |     |     |     |     |     |
| 5 blackcurrant closterovirus 1                | YP_009553664     | 24  | 26  | 21  | 24  | 100   |       |     |     |     |     |     |     |     |     |     |     |     |
| 6 mint virus 1                                | YP_224096        | 27  | 22  | 21  | 26  | 19.58 | 100   |     |     |     |     |     |     |     |     |     |     |     |
| 7 rehmannia virus 1                           | YP_009552009     | 24  | 20  | 23  | 28  | 22.22 | 48.26 | 100 |     |     |     |     |     |     |     |     |     |     |
| 8 tobacco virus 1                             | YP_009162627     | 23  | 21  | 23  | 26  | 22.22 | 48    | 63  | 100 |     |     |     |     |     |     |     |     |     |
| 9 carrot yellow leaf virus                    | YP_003075971     | 27  | 23  | 27  | 25  | 26.29 | 35.2  | 35  | 34  | 100 |     |     |     |     |     |     |     |     |
| 10 carrot closterovirus 1                     | AHA85415         | 26  | 24  | 24  | 29  | 21.65 | 36.92 | 39  | 36  | 46  | 100 |     |     |     |     |     |     |     |
| 11 WhCV1_WL19a (CSL19_contig 5)               |                  | 19  | 20  | 20  | 24  | 25.81 | 26.04 | 25  | 24  | 25  | 27  | 100 |     |     |     |     |     |     |
| 12 WhCV1-WL20 (CSL20_contig 8_12)             |                  | 19  | 21  | 21  | 24  | 24.73 | 26.04 | 26  | 24  | 24  | 26  | 95  | 100 |     |     |     |     |     |
| 13 TSA_Triticum polonicum closterovirus       | DAZ91137         | 19  | 21  | 21  | 24  | 24.73 | 26.04 | 26  | 24  | 24  | 26  | 95  | 99  | 100 |     |     |     |     |
| 14 arracacha virus 1                          | YP_009551999     | 22  | 19  | 20  | 25  | 15.05 | 27.75 | 25  | 29  | 22  | 31  | 28  | 27  | 28  | 100 |     |     |     |
| 15 grapevine leafroll-associated virus 2      | YP_337917        | 23  | 23  | 22  | 23  | 22.92 | 23.71 | 28  | 29  | 26  | 28  | 29  | 29  | 29  | 35  | 100 |     |     |
| 16 beet yellows virus                         | NP_041875        | 23  | 21  | 24  | 25  | 17.95 | 28.5  | 27  | 27  | 24  | 31  | 25  | 26  | 26  | 31  | 36  | 100 |     |
| 17 beet yellow stunt virus                    | YP_009664810     | 23  | 25  | 27  | 28  | 20    | 32.99 | 32  | 30  | 27  | 29  | 28  | 28  | 28  | 31  | 34  | 36  | 100 |

**Figure S3.** Pairwise comparison of the HSP70h (A), RdRP (B) and CP (C) encoded by closteroviruses.

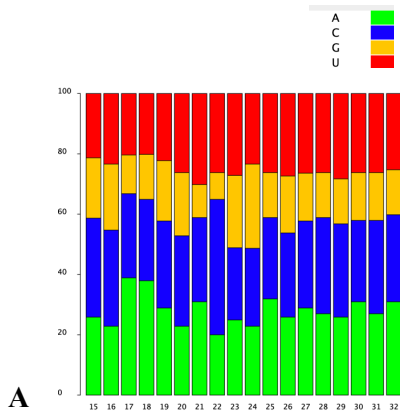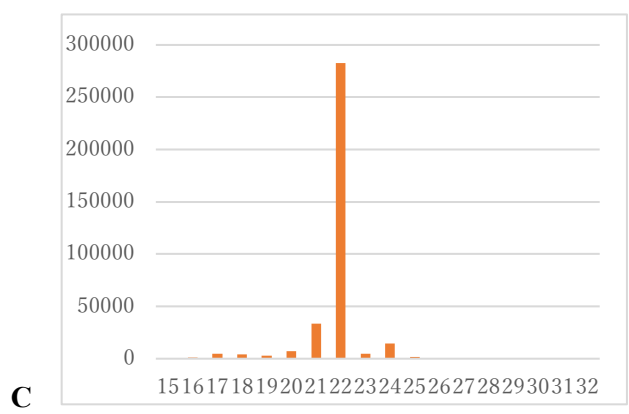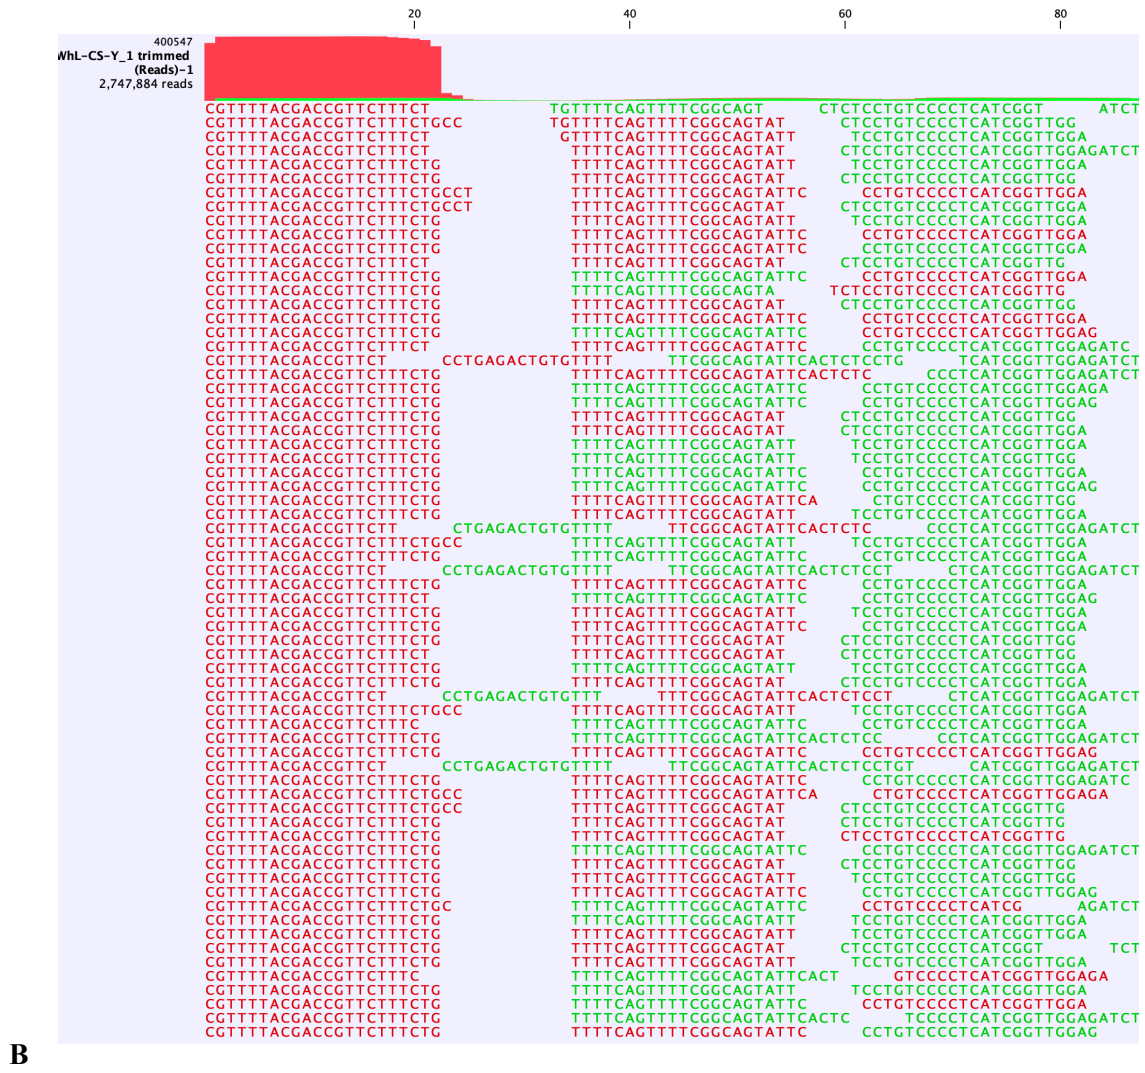

**Figure S4.** Profiles of WhCV1-WL19a small RNAs. **(A)** Proportions of 5'-terminal nucleotide sequences of WhCV1-WL19a-derived small RNAs accumulated in the wheat leaves. **(B)** The partial mapping result of small RNAs at the position around the end of the 5'-terminal region of the WhCV1-WL19a genome. A high number of minus-strand small RNAs were mapped around the nucleotide positions 1–22 of the genome (red text). Small RNA reads were mapped to the WhCV1-WL19a isolate using the Read Mapping algorithm in the CLC Genomics Workbench with stringent mapping parameters (length fraction=1.0; similarity fraction=1.0). **(C)** Size distribution of small RNAs mapped to the nucleotide positions 1–22 of the genome (mostly minus-strand molecules).

**Table S1.** List of primer used in this study.

| Name                                               | oligo nucleotide sequence (5' → 3') |
|----------------------------------------------------|-------------------------------------|
| detection (WhCV1 variant; WL19a, CSL19_contig 5)   |                                     |
| clost3_c11_F                                       | TGTTGATCCTATACCTAGCCATGCT           |
| clost3_c11_R                                       | GCTGCATAAACACTCTTAAGTGGCC           |
| detection (WhCV1 variant; WL20, CSL20_contig 8_12) |                                     |
| clost2_c9_F                                        | AACCGATCCCCAGCCACGCCGAAC            |
| clost2_c9_R                                        | TACCCTCTAAGAGGAATGATCCTCG           |
| detection (BYDV-PAV; WL19b, CS19L contig 1289)     |                                     |
| BYDV-PAV_2939F                                     | CACACGAAGGCGGCGCCGTCGAGC            |
| BYDV-PAV_3358R                                     | GCTGCGCGGAAGGACTTTGAGGCG            |
| 3' RLM-RACE (5' terminal)                          |                                     |
| Clo3_CS19L-5RaR1                                   | GGGACCGGCGCAAGTGGTGCGGTG            |
| Clo3_CS19L-5RaR3                                   | AAGCGGTCAGGAGCGGTGTGACGAG           |
| 3' RLM-RACE (3' terminal)                          |                                     |
| Clos2a-Ra3F1                                       | GTTGCGCTGATACGGCGGTCTGAG            |
| Clos2a-Ra3F3                                       | CGCTCGCTGTATAATCGCGAGCG             |
| 3' RLM-RACE (adapter and reverse primers)          |                                     |
| 5'-p-Adapter                                       | CAATACCTTCTGACCATGCAGTGACAGTCAGCATG |
| 1st-3Race                                          | ATGCTGACTGACACTGCAT                 |
| 2nd-3Race                                          | CACTGCATGGTCAGAAGGTATT              |
